# Supplementary material
Source: publisher figshare collection journal article supplement (https://frontiersin.figshare.com/ndownloader/files/23413199)
Supplement: Supplementary file [file 23413199]

Appendix Table 1. Nucleotide primers used for quantitative real-time polymerase chain reaction

| Accession numbers | Oligo name             | Oligonucleotide sequence (5' to 3') |
|-------------------|------------------------|-------------------------------------|
| NM_009931.2       | Mouse Col4a1 F         | CTGGCACAAAAGGGACGAG                 |
|                   | Mouse Col4a1 R         | ACGTGGCCGAGAATTCACC                 |
| NM_009932.4       | Mouse Col4a2 F         | GACCGAGTGCGGTTCAAAG                 |
|                   | Mouse Col4a2 R         | CGCAGGGCACATCCAACCTT                |
| NM_001317722.1    | Mouse Col11a2 F        | GAAGCAGCCCACTGAGTCTC                |
|                   | Mouse Col11a2 R        | CCTCCCCATATTCCTCTGCCT               |
| NM_001109991.1    | Mouse Col18a1 F        | GTGCCCATCGTCAACCTGAA                |
|                   | Mouse Col18a1 R        | GACATCTCTGCCGTCAAAGAA               |
| NM_011836.4       | Mouse Lamc3 F          | TGCCTGGATTCCACTCACTCA               |
|                   | Mouse Lamc3 R          | CAGGGCGGTATCTGTCACA                 |
| NM_001290421.1    | Mouse Flna F           | TCCCCAACCAGGGCAAATATG               |
|                   | Mouse Flna R           | CTGGCTACCCTGAGGATAGTT               |
| NM_010887.2       | Mouse Ndufs4 F         | CTGCCGTTTCCGTCTGTAGAG               |
|                   | Mouse Ndufs4 R         | TGTTATTGCGAGCAGGAACAAA              |
| NM_025983.3       | Mouse Atp5e F          | CAGGCTGGACTCAGCTACATC               |
|                   | Mouse Atp5e R          | GTTCGCTTTGAACTCGGTCTT               |
| NM_009942.2       | Mouse Cox5b F          | TTCAAGGTTACTTCGCGGAGT               |
|                   | Mouse Cox5b R          | CGGGACTAGATTAGGGTCTTCC              |
| NM_009502         | Mouse Vcl -F           | GAGGCTGAACTGCTTCAATCA               |
|                   | Mouse Vcl -R           | CCAGATTTGACGAGGTGCCTA               |
| NM_007393.5       | Mouse $\beta$ -actin-F | AGAGGGAAATCGTGCGTGAC                |
|                   | Mouse $\beta$ -actin-R | CAATAGTGATGACCTGGCCGT               |

**Appendix Table 2: KEGG enrichment analysis of up-regulated expressed genes between CGF and GF mice (FDR<0.05) .**

| Pathway id | Description                      | Molecules                                                  |
|------------|----------------------------------|------------------------------------------------------------|
| map04974   | Protein digestion and absorption | Col18a1,Col4a1,Col4a2,Col11a2,Col5a1,Col6a2                |
| map04512   | ECM-receptor interaction         | Col4a1,Col4a2,Fn1,Lamc3,Agrn,Col6a2                        |
| map04510   | Focal adhesion                   | Pxn,Col4a1,Col4a2,Fn1,Vcl,Lamc3,Col6a2<br>Flna             |
| map04010   | MAPK signaling pathway           | Map3k13,Cacna1g,Pla2g4b,Dusp1,Nr4a1<br>Cacna1i,Map4k2,Flna |

**Appendix Table 3: KEGG enrichment analysis of up-regulated expressed genes between MDD and HC mice (FDR<0.05).**

| Pathway id | Description                         | Molecules                                                                                         |
|------------|-------------------------------------|---------------------------------------------------------------------------------------------------|
| map04974   | Protein digestion and absorption    | Col18a1,Col4a5,Col6a3,Col5a2,Col4a1,Col1a2<br>Col4a2,Col11a2,Col11a1,Col1a1,Col5a3                |
| map04512   | ECM-receptor interaction            | Col4a5,Col6a3,Hspg2,Col4a1,Col1a2,Col4a2<br>Tnxb,Itga7,Col1a1                                     |
| map04510   | Focal adhesion                      | Col4a5,Col6a3,Crk1,Col4a1,Ppp1r12b,Col1a2<br>Col4a2,Vcl,Flna,Lamc3,Tnxb,Myl9,Itga7,Flna<br>Col1a1 |
| map04713   | Circadian entrainment               | Adcy9,Nos1ap,Cacna1g,Prkg1,Cacna1c,Kcnj9<br>Cacna1i,Kcnj3,Adcy6,Grin1os                           |
| map04010   | MAPK signaling pathway              | Map3k13,Cacna1g,Crk1,Cacna1c,Gm15459<br>Map3k3,Rps6ka2,Cacna2d2,Cacna1i,Flna,Flna                 |
| map04270   | Vascular smooth muscle contraction  | Adcy9,Prkg1,Cacna1c,Ppp1r12b,Myl9,Acta2<br>Adcy6,Arhgef11                                         |
| map04925   | Aldosterone synthesis and secretion | Adcy9,Cacna1g,Cacna1c,Scarb1,Cacna1i,Adcy6                                                        |
| map04724   | Glutamatergic synapse               | Adcy9,Grik3,Cacna1c,Kcnj3,Adcy6,Grin1os                                                           |
| map05224   | Breast cancer                       | Notch3,Axin2,Fzd1,Notch2,Wnt6,Jag2,Lrp5                                                           |
| map04024   | cAMP signaling pathway              | Ghsr,Adcy9,Sstr1,Cacna1c,Hcn4,Myl9,Adcy6<br>Grin1os                                               |

**Appendix Table 4: KEGG enrichment analysis of overlapping DEGs from CG and MH mice (FDR<0.05) .**

| Pathway id | Description                      | Molecules                        |
|------------|----------------------------------|----------------------------------|
| map04974   | Protein digestion and absorption | Col4a1, Col4a2, Col11a2, Col18a1 |
| map04510   | Focal adhesion                   | Col4a1, Col4a2, Vcl, Lamc3, Flna |
| map04512   | ECM-receptor interaction         | Col4a1, Col4a2, Lamc3            |
| map05146   | Amoebiasis                       | Col4a1, Col4a2, Vcl, Lamc3       |
| map05222   | Small cell lung cancer           | Col4a1, Col4a2, Lamc3            |
| map04010   | MAPK signaling pathway           | Map3k13, Cacna1g, Cacna1i, Flna  |

**Appendix Table 5: Oxidative phosphorylation-related genes.**

| Pathway id | Description               | Molecules                                                                                                                                                                                                                |
|------------|---------------------------|--------------------------------------------------------------------------------------------------------------------------------------------------------------------------------------------------------------------------|
| map00190   | Oxidative phosphorylation | Atp5e, Atp5h, Atp5j, Atp6v1g2, Cox5b<br>Cox6c, Cox7a2, Gm10925, Gm12338<br>Gm28661, mt-Co1, mt-Cytb, mt-Nd1<br>mt-Nd2, mt-Nd4, mt-Nd5, mt-Nd6<br>Ndufa1, Ndufa4, Ndufa5, Ndufa6<br>Ndufb3, Ndufs4, Ndufs6, Ndufv3, Uqcrb |

### **Transplantation of MDD patient microbiota induces depressionlike behaviors in GF recipient mice**

To investigate whether changes in gut microbiome contribute to the pathogenesis of MDD, FMT experiments were performed. This approach has been successfully used to determine the causative role of gut microbiota in the onset of obesity, colitis and type I diabetes. Here, as previously reported, adult GF mice were colonized with pooled fecal samples randomly derived from five non-medicated MDD patients and five healthy controls without a priori knowledge of their gut microbial profiles. In the post hoc 16S rRNA gene sequence analysis of these samples, PCoA plot of unweighted and

weighted UniFrac matrix showed that the gut microbial phenotypes of these randomly selected MDD and healthy control samples were similar to their corresponding groups. This humanized FMT model allowed us to: (i) determine whether the depressive phenotypes of MDD patients were transmissible via their gut microbiomes and (ii) comparatively analyze the gut microbial community structure, metabolism and host-microbial co-metabolism of the ‘depression microbiota’ and ‘healthy microbiota’ recipient mice. Initially, the weight of experimental mice was measured weekly.

We found that the weight of ‘depression microbiota’ recipient mice was not significantly different than ‘healthy control’ recipient mice during FMT experimentation. To test whether colonization of GF mice with ‘depression microbiota’ results in depression-like behaviors, three well-established behavioral tests—OFT, FST and TST—were performed on weeks 1 and 2 post FMT. On week 1 post FMT, there were no significant differences in OFT, FST and TST between ‘depression microbiota’ and ‘healthy microbiota’ recipient mice. However, on week 2 post FMT, the ‘depression microbiota’ recipient mice displayed a decreased proportion of center motion distance in the OFT and an increased duration of immobility in the FST and TST as compared with those of ‘healthy control’ recipient mice. However, there were no significant differences in total motion distance between the two groups in the OFT. These findings show that colonization of GF mice with ‘depression microbiota’ resulted in increased depression-like behaviors as compared with colonization with ‘healthy microbiota’. Given that anxiety is a common symptom among MDD patients, anxiety-like behavior was also tested here. We found that ‘depression microbiota’ recipients displayed a decreased center motion distance in the OFT, which is indicative of anxiety-like behavior. Therefore, in this humanized depressed model, diagnostic depressive behavior (as measured via the FST and TST) as well as non-diagnostic anxiety behavior (as measured via the OFT) associated with depression were transmissible via the gut microbiome. (Zheng P et al., 2016)

## **References:**

Zheng P, Zeng B, Zhou C, Liu M, Fang Z, Xu X, Zeng L, Chen J, et al. (2016), Gut microbiome remodeling

induces depressive-like behaviors through a pathway mediated by the host's metabolism. *Mol Psychiatry* 21:786-796.
